# Supplementary material
Source: MDPI journal article supplement (https://www.mdpi.com/search?q=nutrients-10-01100)
Supplement: s001 [file nutrients-10-01100-s001.pdf]

Supplemental Table S1: Correlations between serum retinol or RBP, and inflammation among preschool children, school age children, and women of reproductive age, BRINDA project<sup>1</sup>

| Country                | RBP     |         | Serum retinol |         | CRP    |
|------------------------|---------|---------|---------------|---------|--------|
|                        | CRP     | AGP     | CRP           | AGP     | AGP    |
| PSC                    |         |         |               |         |        |
| Afghanistan(2013)      |         |         | -0.26**       | -0.28** | 0.59** |
| Azerbaijan(2013)       | -0.37** | -0.22** |               |         | 0.66** |
| Bangladesh(2010)       | -0.37** | -0.27** |               |         | 0.64** |
| Bangladesh(2012)       |         |         | -0.32**       | -0.31** | 0.69** |
| Cambodia(2014)         | 0.09*   | 0.64**  |               |         | 0.59** |
| Cameroon(2009)         | -0.41** | -0.32** |               |         | 0.71** |
| Colombia(2010)         |         |         | -0.17**       |         |        |
| Côte d'Ivoire(2007)    | -0.47** | -0.39** |               |         | 0.65** |
| Ecuador(2012)          |         |         | -0.37**       |         |        |
| Kenya(2007)            | -0.45** | -0.38** |               |         | 0.66** |
| Kenya(2010)            | -0.51** | -0.45** |               |         | 0.76** |
| Liberia(2011)          | -0.37** | -0.34** |               |         | 0.65** |
| Malawi(2016)           | -0.42** | -0.33** |               |         | 0.64** |
| Mexico(2012)           |         |         | -0.37**       |         |        |
| Mongolia(2006)         |         |         |               | -0.24** |        |
| Nigeria(2005)          |         |         |               | -0.25** |        |
| Pakistan (2011)        |         |         |               | -0.01   |        |
| Papua New Guinea(2005) | -0.44** | -0.26** |               |         | 0.69** |
| Philippines(2011)      | -0.48** | -0.38** |               |         | 0.75** |
| Vietnam(2010)          |         |         | -0.26**       |         |        |
| SAC                    |         |         |               |         |        |
| Bangladesh(2010)       |         |         | -0.18**       | -0.14** | 0.59** |
| Ecuador(2012)          |         |         | -0.23**       |         |        |
| Malawi(2016)           | -0.39** | -0.37** |               |         | 0.68** |
| Mexico(2012)           |         |         | -0.13**       |         |        |
| United Kingdom (2014)  |         |         | -0.11*        |         |        |
| United States (2006)   |         |         | -0.09**       |         |        |
| WRA                    |         |         |               |         |        |
| Afghanistan(2013)      |         |         | -0.01         | 0.02    | 0.38** |
| Azerbaijan(2013)       | 0.15**  | 0.20**  |               |         | 0.63** |
| Bangladesh(2012)       |         |         | 0.11*         | -0.16** | 0.53** |
| Cambodia(2014)         | 0.22**  | 0.69**  |               |         | 0.40** |
| Cameroon(2009)         | -0.15** | -0.05   |               |         | 0.57** |
| Côte d'Ivoire(2007)    | -0.03   | 0.01    |               |         | 0.5**  |
| Ecuador(2012)          |         |         | -0.08**       |         |        |
| Liberia(2011)          | -0.11** | 0.06*   |               |         | 0.52** |
| Malawi(2016)           | -0.10*  | 0       |               |         | 0.48** |
| Pakistan (2011)        |         |         | 0             | 0.05**  | 0.19** |
| Papua New Guinea(2005) | -0.17** | -0.02   |               |         | 0.53** |
| United Kingdom (2014)  |         |         | 0.02          |         |        |
| United States (2006)   |         |         | 0.09**        |         |        |
| Vietnam(2010)          |         |         | 0.07*         |         |        |

1. \*\*, p-value<0.001; \*, p-value<0.05

Supplemental Table S2: Estimated prevalence of vitamin A deficiency (serum retinol or RBP < 0.7µmol/L) unadjusted and after adjustment in preschool age children, school age children, and women of reproductive age BRINDA project<sup>1</sup>

| Country                      | n    | RBP                 |                     |                   | n        | Exclusion <sup>4</sup> | n    | Retinol             |                     |                     | n    | Exclusion <sup>4</sup> |
|------------------------------|------|---------------------|---------------------|-------------------|----------|------------------------|------|---------------------|---------------------|---------------------|------|------------------------|
|                              |      | Unadjusted          | ICF <sup>2</sup>    | IRC <sup>3</sup>  |          |                        |      | Unadjusted          | ICF <sup>2</sup>    | IRC <sup>3</sup>    |      |                        |
| Preschool age children       |      |                     |                     |                   |          |                        |      |                     |                     |                     |      |                        |
| Afghanistan(2013)            |      |                     |                     |                   |          |                        | 657  | 47.6<br>(42.1,53.1) | 41.5<br>(36.8,46.2) | 37.4<br>(32.2,42.7) | 478  | 39.3 (33.1,45.5)       |
| Azerbaijan(2013)             | 1053 | 12.2<br>(8.9,15.5)  | 7.1 (4.6,9.7)       | 6.1<br>(3.6,8.6)  | 756      | 5.8 (2.9,8.8)          |      |                     |                     |                     |      |                        |
| Bangladesh(2010)             | 1493 | 17.0<br>(14.4,19.7) | 10.1<br>(7.6,12.6)  | 5.6<br>(3.6,7.5)  | 958      | 9.6 (6.8,12.4)         |      |                     |                     |                     |      |                        |
| Bangladesh(2012)             |      |                     |                     |                   |          |                        | 458  | 20.6<br>(14.1,27.1) | 17.8 (11.7,24)      | 4.7 (2,7.3)         | 320  | 15.7 (7.6,23.8)        |
| Cambodia(2014) <sup>5</sup>  | 665  | 9.9 (6.5,13.3)      |                     |                   |          |                        |      |                     |                     |                     |      |                        |
| Cameroon(2009)               | 774  | 28.5<br>(24.3,32.7) | 17.3<br>(13.9,20.6) | 9.3 (7,11.7)      | 411      | 16.6 (12,21.2)         |      |                     |                     |                     |      |                        |
| Colombia(2010)               |      |                     |                     |                   |          |                        | 3794 | 23.9<br>(21.9,25.8) | 20.5<br>(18.6,22.4) | 17.6<br>(15.9,19.3) | 3069 | 21.1 (19,23.2)         |
| Côte d'Ivoire(2007)          | 733  | 24.0<br>(20.3,27.8) | 12.1<br>(9.8,14.4)  | 2.7 (1.4,4)       | 227      | 8.7 (5.3,12)           |      |                     |                     |                     |      |                        |
| Ecuador(2012)                |      |                     |                     |                   |          |                        | 2017 | 22.4<br>(19.4,25.4) | 18.4<br>(15.5,21.2) | 15.9 (12.8,19)      | 1772 | 18.5 (15.6,21.5)       |
| Kenya(2007)                  | 888  | 23.0<br>(19.1,26.8) | 11.1<br>(8.5,13.8)  | 5.5<br>(3.7,7.4)  | 302      | 6.3 (3.3,9.3)          |      |                     |                     |                     |      |                        |
| Kenya(2010)                  | 843  | 29.5<br>(25.7,33.4) | 15.9<br>(13.3,18.5) | 7.4<br>(5.9,8.8)  | 321      | 11.5 (7.9,15.1)        |      |                     |                     |                     |      |                        |
| Liberia(2011)                | 1434 | 24.7<br>(21.2,28.1) | 14.3<br>(11.9,16.8) | 5.3<br>(3.8,6.8)  | 633      | 11.6 (8.4,14.8)        |      |                     |                     |                     |      |                        |
| Mongolia(2006) <sup>6</sup>  |      |                     |                     |                   |          |                        | 202  | 36.1<br>(29.5,42.8) | 31.2<br>(24.8,37.6) | 26.2<br>(20.3,32.3) | 149  | 28.9 (21.6,36.1)       |
| Malawi(2016) <sup>4</sup>    | 1084 | 23.0<br>(19.1,26.8) | 16 (12.4,19.6)      | 7.7<br>(5.1,10.2) | 444      | 13 (5.8,20.1)          |      |                     |                     |                     |      |                        |
| Mexico(2012)                 |      |                     |                     |                   |          |                        | 2512 | 15.9<br>(13.4,18.4) | 12.2 (10,14.4)      | 7.3 (5.7,8.9)       | 2253 | 11.3 (9.1,13.6)        |
| Nigeria(2005)                |      |                     |                     |                   |          |                        | 1420 | 1.9 (1,2.7)         | 1.4 (0.7,2.1)       | 0.8 (0.3,1.3)       | 1083 | 0.7 (0.2,1.2)          |
| Papua New Guinea(2005)       | 871  | 25.0<br>(20.8,29.3) | 15.2<br>(12.2,18.1) | 9.9 (7.7,12)      | 369      | 12.9 (8.9,16.9)        |      |                     |                     |                     |      |                        |
| Philippines(2011)            | 1767 | 6.9 (5.1,8.7)       | 1.8 (1.1,2.5)       | 0.9<br>(0.4,1.4)  | 127<br>4 | 1.4 (0.8,1.9)          |      |                     |                     |                     |      |                        |
| Pakistan (2011) <sup>5</sup> |      |                     |                     |                   |          |                        | 7318 | 52.3<br>(50.1,54.6) |                     |                     |      |                        |
| Vietnam(2010)                |      |                     |                     |                   |          |                        | 360  | 6.9 (4.3,9.6)       | 6.1 (3.7,8.6)       | 5.6 (3.1,8)         | 314  | 6.7 (3.8,9.5)          |
| School age children          |      |                     |                     |                   |          |                        |      |                     |                     |                     |      |                        |

|                           |      |                    |               |             |     |               |                     |                |                    |      |                  |
|---------------------------|------|--------------------|---------------|-------------|-----|---------------|---------------------|----------------|--------------------|------|------------------|
| Bangladesh(2010)          |      |                    |               |             |     | 1271          | 23.3<br>(18.9,27.7) | 20.3 (16.6,24) | 16.4 (12.7,20)     | 1089 | 19.3 (15.4,23.2) |
| Ecuador(2012)             |      |                    |               |             |     | 3281          | 15.1<br>(12.5,17.6) | 13.5 (11,16)   | 11.2<br>(9.2,13.1) | 3060 | 13.1 (10.4,15.8) |
| Malawi(2016)              | 758  | 12.6<br>(9.1,16.2) | 5.5 (2.6,8.3) | 3.8 (1.6,6) | 483 | 6.0 (3.5,8.5) |                     |                |                    |      |                  |
| Mexico(2012)              |      |                    |               |             |     | 3144          | 2.3 (1.7,3)         | 1.7 (1.1,2.3)  | 1.4 (0.9,2)        | 2874 | 1.7 (1,2.3)      |
| United Kingdom (2014)     |      |                    |               |             |     | 556           | 1.9 (0.7,3.1)       | 1.6 (0.5,2.8)  | 1.2 (0.2,2.3)      | 536  | 1.6 (0.5,2.8)    |
| United States (2006)      |      |                    |               |             |     | 3089          | 0.6 (0.4,0.8)       | 0.5 (0.3,0.7)  | 0.4 (0.2,0.6)      | 2857 | 0.3 (0.1,0.5)    |
| Women of reproductive age |      |                    |               |             |     |               |                     |                |                    |      |                  |
| Afghanistan(2013)         |      |                    |               |             |     | 1046          | 10.1<br>(7.5,12.7)  |                |                    |      |                  |
| Azerbaijan(2013)          | 2656 | 0.4 (0.1,0.7)      |               |             |     |               |                     |                |                    |      |                  |
| Bangladesh(2012)          |      |                    |               |             |     | 897           | 7.2 (3.7,10.7)      |                |                    |      |                  |
| Cambodia(2014)            | 705  | 2.9 (1.6,4.1)      |               |             |     |               |                     |                |                    |      |                  |
| Cameroon(2009)            | 751  | 1.5 (0.6,2.4)      |               |             |     | 104           | 6.8 (1.6,12)        |                |                    |      |                  |
| Côte d'Ivoire(2007)       | 816  | 0.7 (0.2,1.3)      |               |             |     |               |                     |                |                    |      |                  |
| Ecuador(2012)             |      |                    |               |             |     | 5979          | 2.6 (1.5,3.7)       |                |                    |      |                  |
| Liberia(2011)             | 1875 | 2.3 (1.4,3.1)      |               |             |     |               |                     |                |                    |      |                  |
| Malawi(2016)              | 753  | 3 (1.3,4.7)        |               |             |     |               |                     |                |                    |      |                  |
| Papua New Guinea(2005)    | 749  | 0.6 (0,1.1)        |               |             |     |               |                     |                |                    |      |                  |
| Pakistan (2011)           |      |                    |               |             |     | 5929          | 39.1<br>(36.8,41.4) |                |                    |      |                  |
| United Kingdom (2014)     |      |                    |               |             |     | 875           | 1 (0,2.1)           |                |                    |      |                  |
| United States (2006)      |      |                    |               |             |     | 3145          | 0.3 (0.1,0.6)       |                |                    |      |                  |
| Vietnam(2010)             |      |                    |               |             |     | 1434          | 1.3 (0.7,1.9)       |                |                    |      |                  |

- Values are percent (95% CI); AGP,  $\alpha$ 1-acid glycoprotein; BCF, BRINDA Correction Factor; CRP, C-Reactive Protein; ICF, Internal Correction; IRC, Internal Regression Correction; Vitamin A deficiency defined as retinol binding protein or serum retinol < 0.70  $\mu$ mol/L.
- Country-specific internal correction factors - four stages of inflammation for RBP analyses:  
PSC: Azerbaijan: CRP=1.21 CRP+AGP=1.43 AGP=1.12; Bangladesh: CRP=1.31 CRP+AGP=1.27 AGP=1.11; Côte d'Ivoire: CRP=1.18 CRP+AGP=1.38 AGP=1.08; Cambodia: CRP=1.25 CRP+AGP=0.70 AGP=0.49; Cameroon: CRP=1.21 CRP+AGP=1.30 AGP=1.04; Kenya2007: CRP=1.28 CRP+AGP=1.42 AGP=1.10; Kenya2010: CRP=1.13 CRP+AGP=1.48 AGP=1.08; Liberia: CRP=1.10 CRP+AGP=1.34 AGP=1.09; Malawi: CRP=1.42 CRP+AGP=1.32 AGP=1.07; Papua New Guinea: CRP=1.25 CRP+AGP=1.30 AGP=1.03; Philippines: CRP=1.27 CRP+AGP=1.50 AGP=1.11  
SAC: Malawi: CRP=1.21 CRP+AGP=1.38 AGP=1.12  
Country-specific internal correction factors - four stages of inflammation for serum retinol analyses:

PSC: Afghanistan CRP=1.02 CRP+AGP=1.57 AGP=1.27; Bangladesh2012: CRP=1.63 CRP+AGP=1.24 AGP=1.03; Colombia: CRP=1.13; Ecuador CRP=1.26; Mexico2010 CRP=1.36; Vietnam CRP=1.12; Mongolia AGP=1.20; Nigeria AGP=1.12; Pakistan AGP=0.96

SAC: Bangladesh2012: CRP=1.11 CRP+AGP=1.47 AGP=1.09; Ecuador: CRP=1.21; Mexico2013: CRP=1.17; UK CRP=1.15; US: CRP=1.17

3. Survey-specific internal BRINDA regression correction (p-value) for RBP analyses:

PSC: Bangladesh:  $\ln\text{CRP}=-0.051(<0.001)$   $\ln\text{AGP}=-0.041(\text{ns})$ ; Cameroon:  $\ln\text{CRP}=-0.054(<0.001)$   $\ln\text{AGP}=-0.115(<0.05)$ ; Côte d'Ivoire:  $\ln\text{CRP}=-0.074(<0.001)$   $\ln\text{AGP}=-0.171(<0.001)$ ; Kenya 2007:  $\ln\text{CRP}=-0.049(<0.001)$   $\ln\text{AGP}=-0.158(<0.001)$ ; Kenya 2010:  $\ln\text{CRP}=-0.063(<0.001)$   $\ln\text{AGP}=-0.174(<0.001)$ ; Liberia:  $\ln\text{CRP}=-0.051(<0.001)$   $\ln\text{AGP}=-0.199(<0.001)$ ; Papua New Guinea:  $\ln\text{CRP}=-0.067(<0.001)$   $\ln\text{AGP}=0.038(\text{ns})$ ; Philippines:  $\ln\text{CRP}=-0.064(<0.001)$   $\ln\text{AGP}=-0.052(<0.05)$ ; Cambodia:  $\ln\text{CRP}=-0.174(<0.001)$   $\ln\text{AGP}=0.659(<0.001)$ ; Malawi:  $\ln\text{CRP}=-0.063(<0.001)$   $\ln\text{AGP}=-0.058(<0.05)$ ; Azerbaijan:  $\ln\text{CRP}=-0.056(<0.001)$   $\ln\text{AGP}=-0.007(\text{ns})$

SAC: Malawi:  $\ln\text{CRP}=-0.043(<0.001)$   $\ln\text{AGP}=-0.123 (<0.001)$ ;

Survey-specific internal BRINDA regression correction (p-value) for serum retinol analyses:

PSC: Afghanistan  $\ln\text{CRP}=-0.048 (<0.001)$ ,  $\ln\text{AGP}=-0.160 (<0.05)$ ; Bangladesh  $\ln\text{CRP}=-0.062(<0.001)$ ,  $\ln\text{AGP}=-0.147 (<0.05)$ ; Colombia  $\ln\text{CRP}=-0.032(<0.001)$ ; Mexico  $\ln\text{CRP}=-0.069 (<0.001)$ ; Mongolia  $\ln\text{AGP}=-0.287 (<0.05)$ ; Nicaragua  $\ln\text{AGP}=-0.220 (<0.001)$ ; Pakistan  $\ln\text{AGP}=-0.023 (\text{ns})$ ; Vietnam  $\ln\text{CRP}=-0.043 (p<0.05)$

SAC: Bangladesh2012:  $\ln\text{CRP}=-0.073(<0.001)$   $\ln\text{AGP}=-0.036(\text{ns})$ ; Ecuador:  $\ln\text{CRP}=-0.147(<0.001)$ ; Mexico2012:  $\ln\text{CRP}=-0.027(<0.001)$ ; UK:  $\ln\text{CRP}=-0.069(<0.001)$ ; US:  $\ln\text{CRP}=-0.023 (<0.001)$

4. Vitamin A deficiency among the subset of samples with non-elevated inflammatory biomarkers.

5. No adjustments were made for Pakistan and Cambodia surveys, because of poor correlation between vitamin A measures and inflammation,

6. Mongolia did not apply complex survey design, so binomial proportion test was used to calculate 95% CI.

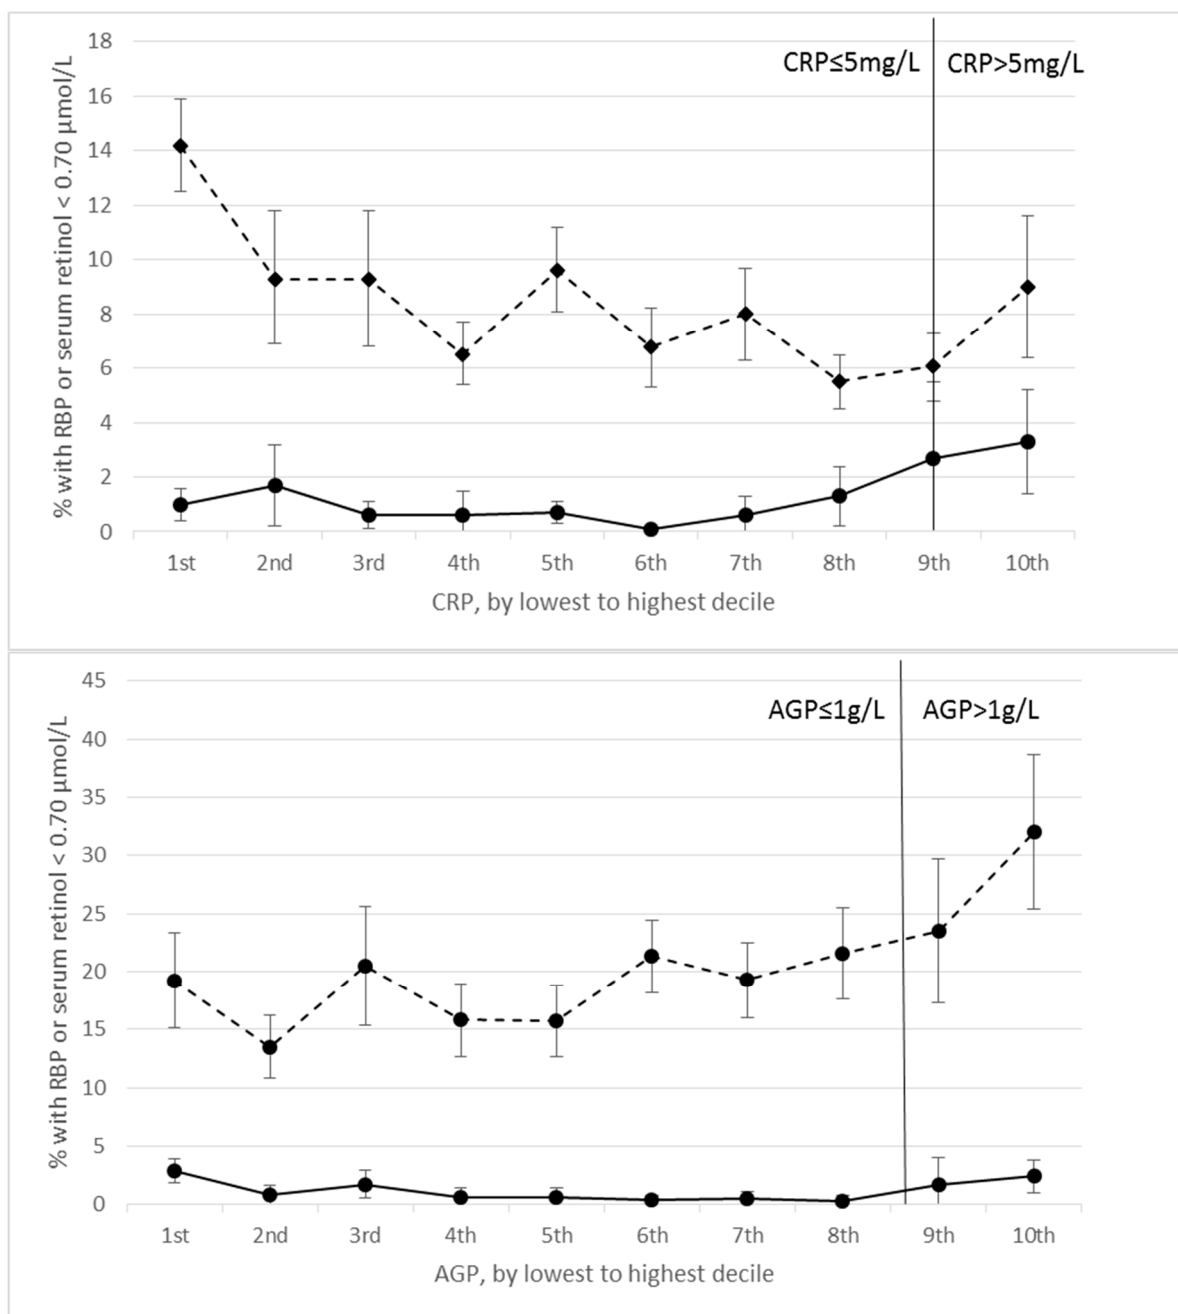

**Supplemental Figure S1:** Estimated prevalence (95% CI) of vitamin A deficiency in women of reproductive age by CRP (top) and AGP (bottom) deciles. Top figure: solid line represents prevalence of RBP < 0.70 μmol/L (n = 8,305), dotted line represents prevalence of retinol < 0.70 μmol/L (n = 19,305). Bottom figure: solid line represents prevalence of RBP < 0.70 μmol/L (n = 8,305), dotted line represents prevalence of retinol < 0.70 μmol/L (n = 7,872). AGP, α1-acid glycoprotein; CRP, C-reactive protein; RBP, retinol binding protein.
